# Supplementary material for: Low use of condom and high STI incidence among men who have sex with men in PrEP programs
Source: PubMed Central journal article supplement (PMC7861516; doi:10.1371/journal.pone.0245925), 2021-02-04
Supplement: pone.0245925.s002.pdf [file pone.0245925.s002.pdf]

# Información sobre el archivo: de la base resumida

## Valores de las variables

| Valor               |      | Etiqueta       |
|---------------------|------|----------------|
| Edad_cat            | 1,00 | 20-25          |
|                     | 2,00 | 26-30          |
|                     | 3,00 | 31-35          |
|                     | 4,00 | 36-40          |
|                     | 5,00 | >40            |
| Edad_3cat           | 1,00 | 20-30          |
|                     | 2,00 | 31-40          |
|                     | 3,00 | >40            |
| ESPAÑOL_01          | ,00  | Espanol        |
|                     | 1,00 | No espanol     |
| Origen_3cat         | 1,00 | Esp            |
|                     | 2,00 | Lat            |
|                     | 3,00 | Otros          |
| dism_uso_preserv_01 | ,00  | No             |
|                     | 1,00 | Si             |
| PSTVOSEXOANALANTE   | ,00  | Nunca          |
| SPREP_3CAT          | 1,00 | <50%           |
|                     | 2,00 | >50% + siempre |
| PSTVO_SEXO_ANAL_    | ,00  | Siempre + >50% |
| ANTES_PREP_CAT      | 1,00 | Nunca + <50%   |
| PSTVOSEXOANALDESP   | ,00  | Nunca          |
| PREP_3CAT           | 1,00 | <50%           |
|                     | 2,00 | >50% + siempre |
| Nº                  | ,00  | 1-10           |
| CONTACTOSSEXMESA    | 1,00 | 10-50          |
| NTESPREP_3cat       | 2,00 | >50            |
| NUM_CONTACTO_       | ,00  | <10            |
| SEX_MES_ANTES_      | 1,00 | >10            |
| Nº                  | ,00  | 1-10           |
| CONTACTOSSEXMESD    | 1,00 | 10-50          |
| ESDEPREP_3cat       | 2,00 | >50            |
| DROGA_SINO          | ,00  | No             |
|                     | 1,00 | Si             |
| DROGAS_SEX_SI_NO    | ,00  | No             |
|                     | 1,00 | Si             |
| AUMNETO_CONSU_AL_   | 1    | NO             |
| DROGAS_NUM          | 2    | SI             |
| ALCOHOL_NUM         | 2    | NO             |
|                     | 3    | SI             |
| CANNABIS_NUM        | 2    | NO             |
|                     | 3    | SI             |
| POPPER_NUM          | 2    | NO             |
|                     | 3    | SI             |
| COCAINA_NUM         | 2    | NO             |
|                     | 3    | SI             |
| EXTASIS_NUM         | 2    | NO             |
|                     | 3    | SI             |
| MDMA_NUM            | 2    | NO             |
|                     | 3    | SI             |
| GHB_NUM             | 2    | NO             |
|                     | 3    | SI             |

Valores de las variables

| Valor               | Etiqueta          |
|---------------------|-------------------|
| MEFE_NUM            | 2 NO              |
|                     | 3 SI              |
| TINA_NUM            | 2 NO              |
|                     | 3 SI              |
| NOPREPEFECTP_ALC_   | 2 NO              |
| DROGAS              | 3 SI              |
| ALCOHOL_SEX_NUM     | 1 NO              |
|                     | 2 SI              |
| CANNB_SEX_NUM       | 1 NO              |
|                     | 2 SI              |
| POPPER_SEX_NUM      | 1 NO              |
|                     | 2 SI              |
| COCAINA_SEX_NUM     | 1 NO              |
|                     | 2 SI              |
| EXTASI_SEX_NUM      | 1 NO              |
|                     | 2 SI              |
| MDMA_SEX_NUM        | 1 NO              |
|                     | 2 SI              |
| GHB_SEX_NUM         | 1 NO              |
|                     | 2 SI              |
| MEFE_SEX_NUM        | 1 NO              |
|                     | 2 SI              |
| TINA_SEX_NUM        | 1 NO              |
|                     | 2 SI              |
| APPS_NUM            | 1 NO              |
|                     | 2 SI              |
| CHEMSEX_NUM         | 1 NO              |
|                     | 2 SI              |
| NUM_EPIS_INI_AS_CAT | ,00 0             |
|                     | 1,00 1            |
|                     | 2,00 2            |
|                     | 3,00 >2           |
| NUM_ITS_6M_AS_CAT   | ,00 0             |
|                     | 1,00 1            |
|                     | 2,00 2            |
|                     | 3,00 >2           |
| NUM_ITS_12M_AS_CAT  | ,00 0             |
|                     | 1,00 1            |
|                     | 2,00 2            |
|                     | 3,00 >2           |
| NUM_ITS_18M_AS_CAT  | ,00 0             |
|                     | 1,00 1            |
|                     | 2,00 2            |
|                     | 3,00 >2           |
| NUM_ITS_24M_AS_CAT  | ,00 0             |
|                     | 1,00 1            |
|                     | 2,00 2            |
|                     | 3,00 >2           |
| filter_\$           | 0 No seleccionado |
|                     | 1 Seleccionado    |
